# Supplementary material for: Rapamycin-Loaded Polymeric Nanoparticles as an Advanced Formulation for Macrophage Targeting in Atherosclerosis
Source: MDPI journal article supplement (doi:10.3390/pharmaceutics13040503), 2021-04-07
Supplement: s1 [file s1]

# Supplementary Materials: Rapamycin-Loaded Polymeric Nanoparticles as an Advanced Formulation for Macrophage Targeting in Atherosclerosis

Emanuela Fabiola Craparo, Marta Cabibbo, Alice Conigliaro, Maria Magdalena Barreca, Teresa Musumeci, Gaetano Giammona, Gennara Cavallaro

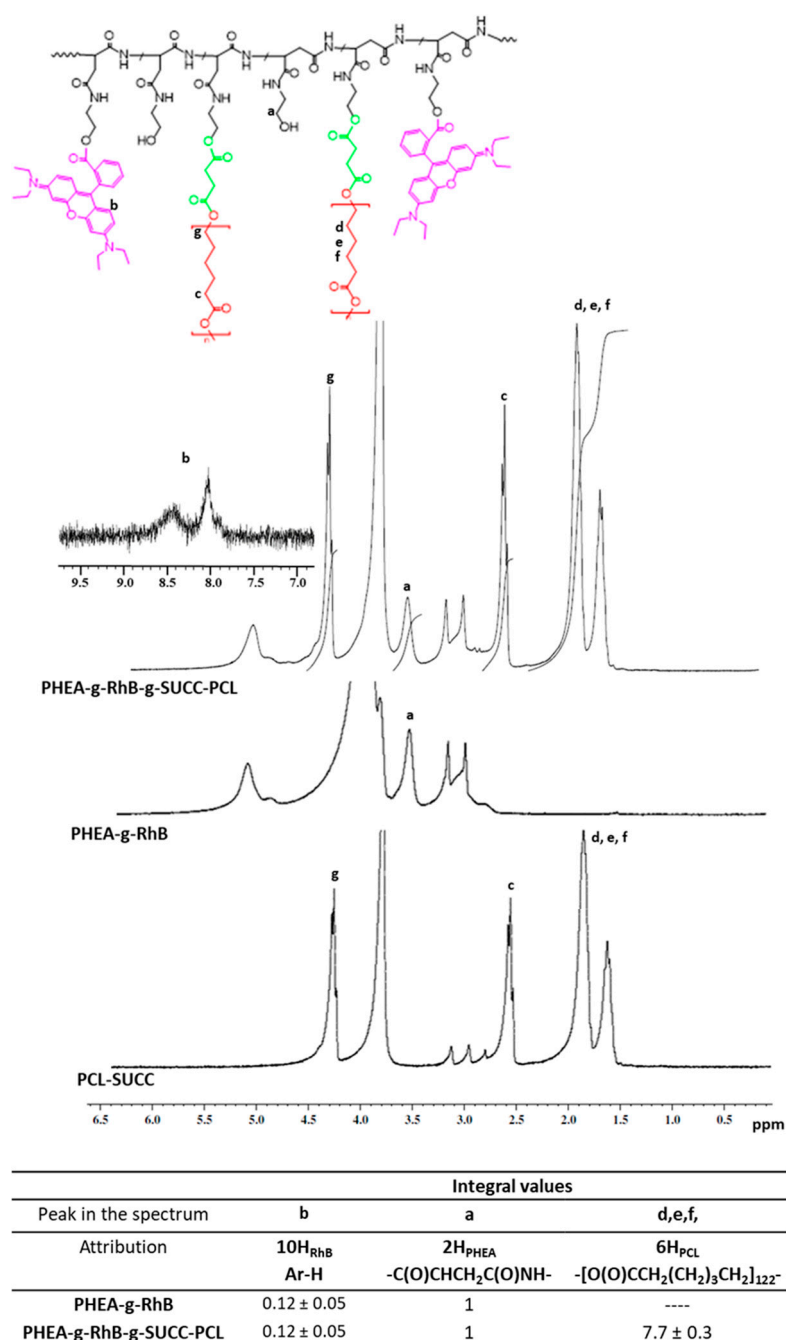

**Figure S1.** <sup>1</sup>H NMR spectra of PHEA-g-RhB, PCL-SUCC, and PHEA-g-RhB-g-SUCC-PCL copolymers in DMF-d<sub>7</sub>.

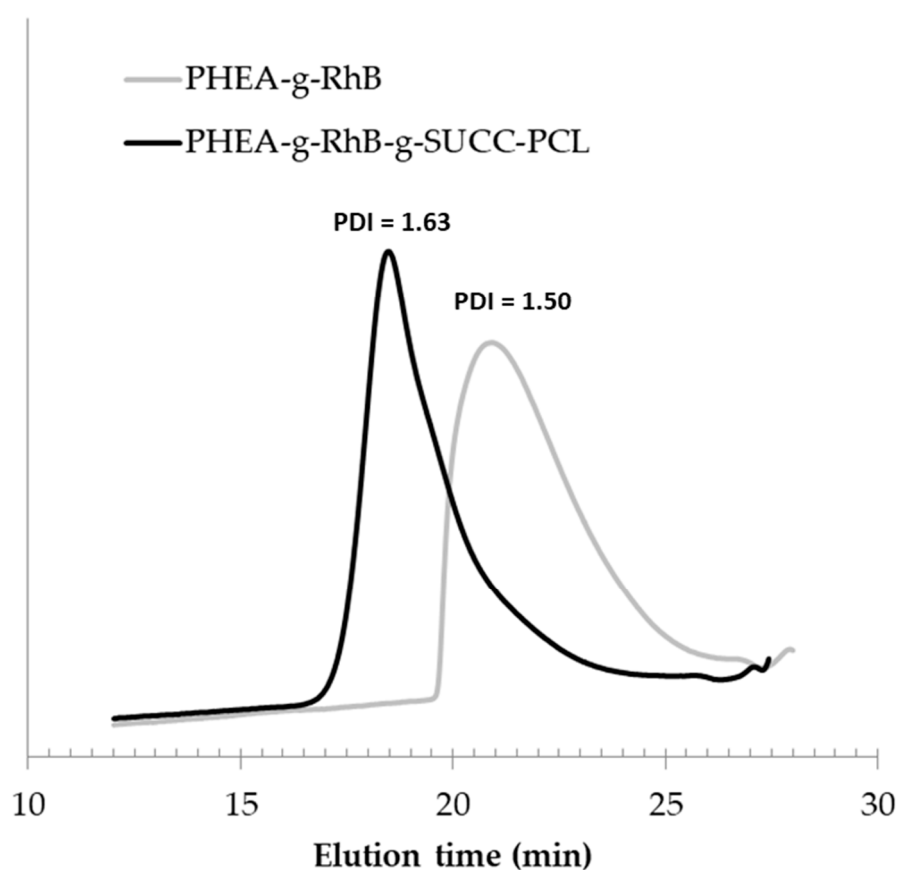

**Figure S2.** Size Exclusion Chromatography (SEC) chromatograms for PHEA-RhB (grey line) and PHEA-g-RhB-g-SUCC-PCL graft copolymers in DMF + LiBr 0.01 M.

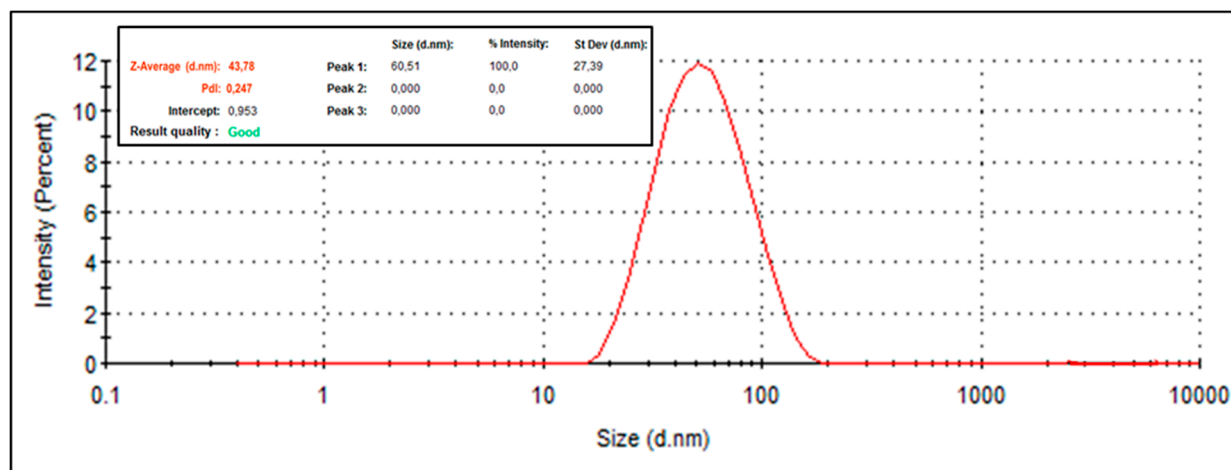

**Figure S3.** Distribution size (intensity%) of sample Rapa-loaded KP-Nano, determined by DLS.

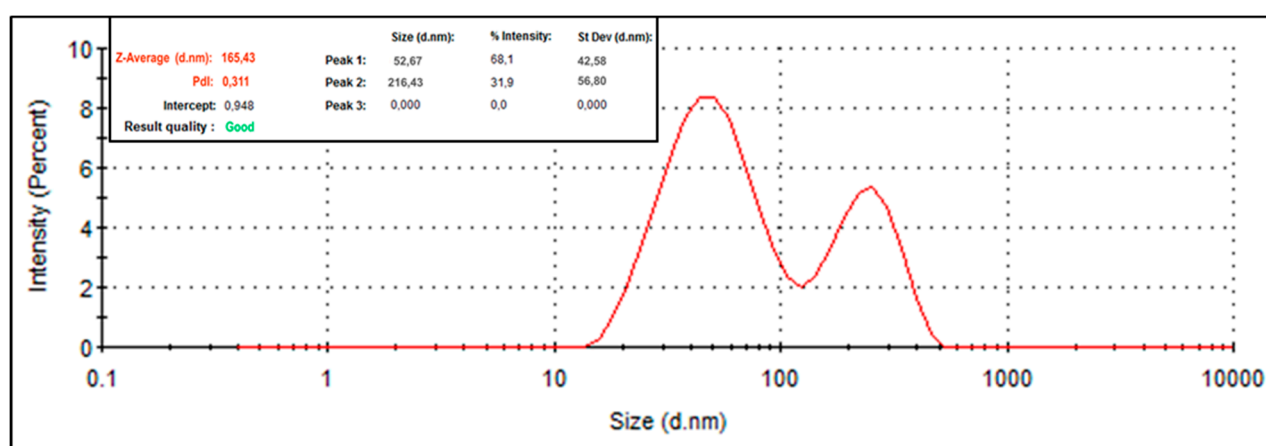

**Figure S4.** Distribution size (intensity%) of sample Rapa-loaded KP-Nano after freeze drying, determined by DLS.
